# Supplementary material
Source: Springer Nature journal article supplement (https://www.springermedizin.de/resource/supplementary/12873_2013_196_MOESM2_ESM.pdf/9431600)

# Respondents by Organisation (n=399)

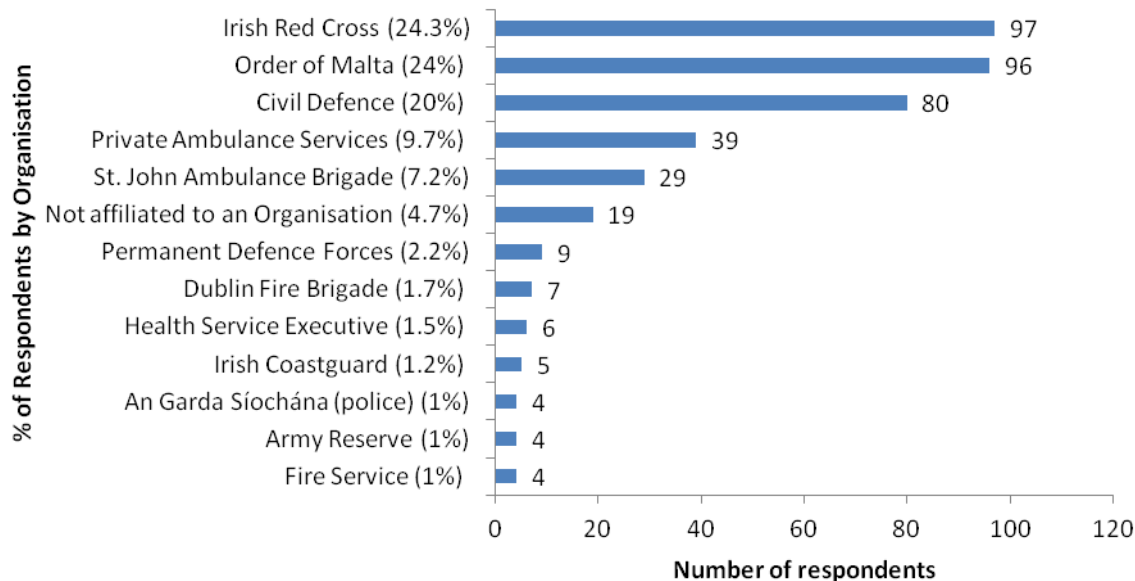

Supplement: MOESM2 [file 9431600]
